# Supplementary material
Source: PubMed Central journal article supplement (PMC11067653)
Supplement: NIHPP2024.03.11.584473V2-supplement-1.pdf [file NIHPP2024.03.11.584473V2-supplement-1.pdf]

**Supplemental Figure 1: Synthesis of single-domain antibody (sdAb)-based protein degrader.**

sdAb 2D8 was conjugated to thalidomide (an E3 ligase ligand) using three different lengths of linkers [(PEG)<sub>n</sub>, n=2, 4, 6], that were attached to the lysine residues of the sdAb. Both unmodified sdAb 2D8 and the three modified sdAbs contained Myc and His tags at the N-terminal. Western blots show the detection of the sdAbs by anti-Myc antibody (A) and anti-His antibody (B).

**Supplemental Figure 2: Assessment of toxicity of human Lewy body dementia (LBD) brain fractions.**

(A) Schematic protocol illustrating the preparation of different fraction of  $\alpha$ -syn from LBD brain. (B-C) Immunoblots illustrating GAPDH levels in treated cell lysate on different days (B). Toxicity of different  $\alpha$ -syn fractions of LBD brain (C). Neuronal cultures were prepared from wild-type pups at day 0. Cells were incubated for 1, 2, 3, 5 and 7 days with 10  $\mu$ g/ml of each of the six brain fractions. Toxicity was assessed by western blotting for GAPDH.

Day 1: A one-way ANOVA showed a significant overall treatment effect ( $p < 0.0001$ ). Cells treated with P1 fractions had significantly higher GAPDH levels compared to untreated control cells ( $p < 0.0001$ ).

Day 2: A one-way ANOVA showed a significant overall treatment effect ( $p < 0.0001$ ). Cells treated with either S2 ( $p = 0.0375$ ) and S3 ( $p < 0.0001$ ) fractions had significantly higher GAPDH levels compared to untreated control cells.

Day 3: A one-way ANOVA showed a significant overall treatment effect ( $p = 0.0054$ ). Cells treated with either S3 ( $p = 0.0108$ ) and P2 ( $p = 0.0304$ ) fractions had significantly higher GAPDH levels compared to untreated control cells.

Day 5: A one-way ANOVA showed a significant overall treatment effect ( $p < 0.0001$ ). The S1 fraction produced significant toxicity when compared to untreated control cells ( $p = 0.0005$ ). Cells treated with either the S2, S3, P2 and P3 fractions had significantly higher GAPDH levels compared to untreated control cells. ( $p = 0.0169$ ,  $p < 0.0001$ ,  $p < 0.0001$ ,  $p = 0.036$ ).

\*\*, \*\*\*, \*\*\*\*:  $p < 0.01$ ,  $0.001$ ,  $0.0001$  (Tukey's post-hoc test).

### **Supplemental Figure 3: Immunoprecipitation (IP) depletion of $\alpha$ -syn from LBD S1-fraction and dot blot assay.**

(A) Schematic protocol for IP and dot blot assays. The experimental details are described in the Materials and Methods section.

(B) Dot blot image and quantification. Positive control: rec  $\alpha$ -syn; Negative control: bovine serum albumin (BSA). Dot blot analysis revealed significant differences in normalized signals between the groups ( $p < 0.0001$  for 2D8, 2D8-PEG2-T, 2D8-PEG4-T, and 2D8-PEG6-T; one-way ANOVA). Both 2D8 and modified 2D8 showed reduced binding after  $\alpha$ -syn depletion, with binding decreasing by 90% ( $p < 0.0001$ , 2D8), 92% ( $p < 0.0001$ , 2D8-PEG2-T), 90% ( $p < 0.0001$ , 2D8-PEG4-T), and 91% ( $p < 0.0001$ , 2D8-PEG6-

T) compared to S1, respectively. Notably, stronger binding of S1 (IP  $\alpha$ -syn) was observed, with binding increasing by 86% ( $p < 0.0001$ , 2D8), 88% ( $p < 0.0001$ , 2D8-PEG2-T), 86% ( $p < 0.0001$ , 2D8-PEG4-T), and 88% ( $p < 0.0001$ , 2D8-PEG6-T) compared to S1 (IP  $\alpha$ -syn flow through), respectively.

#### **Supplemental Figure 4: $\alpha$ -Syn seeding experiment.**

Neuronal cultures were established from M83 mouse pups on day 0. Cells were treated with 10  $\mu$ g/ml of LBD S1 fraction for 1, 2, 3, 5, and 7 days. The  $\alpha$ -syn seeding capacity was evaluated using dot blot assays with conformational antibodies A11 (A) and OC (B). Quantitative analysis of the dot blot signals revealed significantly increased levels of  $\alpha$ -syn aggregates in the presence of the LBD brain soluble S1 fraction (A11 antibody (C):  $p = 0.0241$  (day 3),  $p = 0.0048$  (day 5),  $p = 0.0151$  (day 7); OC antibody (D):  $p = 0.0007$  (day 3),  $p = 0.0286$  (day 5); unpaired t-test).

#### **Supplemental Figure 5: Complete western blots and bands quantified in Fig. 3.**

#### **Supplemental Figure 6: Complete western blots and bands quantified in Fig. 4.**

#### **Supplemental Figure 7: Complete western blots and bands quantified in Fig. 5.**

#### **Supplemental Figure 8: (A-B) Quantitation for the western bands presented in Figure 6 (C-D).**

(A) Long conjugations to  $\alpha$ -syn: Significant differences were observed between groups in long conjugations to  $\alpha$ -syn (Figure 6C (i), one-way ANOVA,  $p = 0.0017$ ). The modified sdAb 2D8-PEG4-T

with the proteasome inhibitor MG132 resulted in a 56% increase in long conjugations to  $\alpha$ -syn compared to untreated sdAb 2D8 with MG132 ( $p=0.0245$ ).

**(B) Ubiquitin levels:** Significant group differences were observed in ubiquitin levels (Figure 6D (i), one-way ANOVA,  $p<0.0001$ ). The modified sdAb 2D8-PEG4-T significantly elevated ubiquitin levels by 53% ( $p=0.0064$ ) and 43% ( $p=0.0208$ ) compared to S1 alone and sdAb 2D8, respectively. Treatment with the proteasome inhibitor MG132 notably increased ubiquitin levels by 42% ( $p=0.027$ , sdAb 2D8 vs sdAb 2D8 + MG132) and 49% ( $p=0.0002$ , sdAb 2D8-PEG4-T vs sdAb 2D8-PEG4-T + MG132) for both unmodified and modified sdAb 2D8 groups. Furthermore, modified sdAb 2D8-PEG4-T combined with MG132 led to a 50% increase in ubiquitin levels compared to unmodified sdAb 2D8 with MG132 ( $p=0.0001$ ).

**(C-D) Complete Western Blots** in Figure 6E.

**Supplemental Figure 9: Brain-signal declines over days post single intravenous injection of near-infrared-labeled sdAb 2D8 (10 mg/kg).**

**Supplemental Figure 10: Complete western blots and bands quantified in Fig. 8-9.**

The single band without a box in soluble  $\alpha$ -syn 211 and GAPDH as well as insoluble  $\alpha$ -syn 211 is an animal that was excluded from all analyses because of a very high IVIS signal throughout the body that appeared to be non-specific.

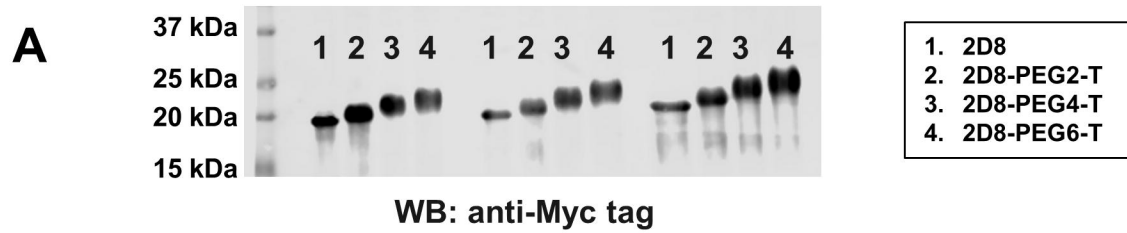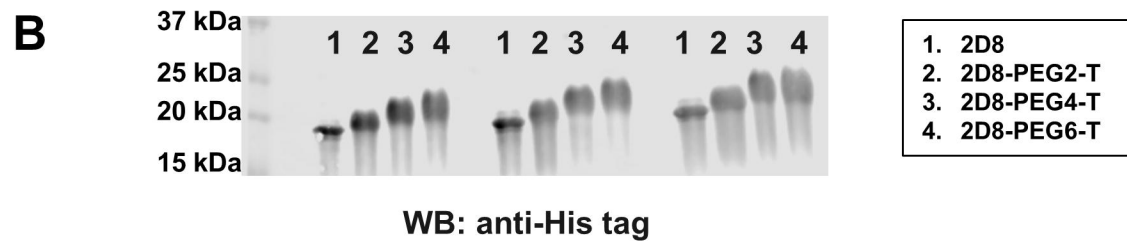

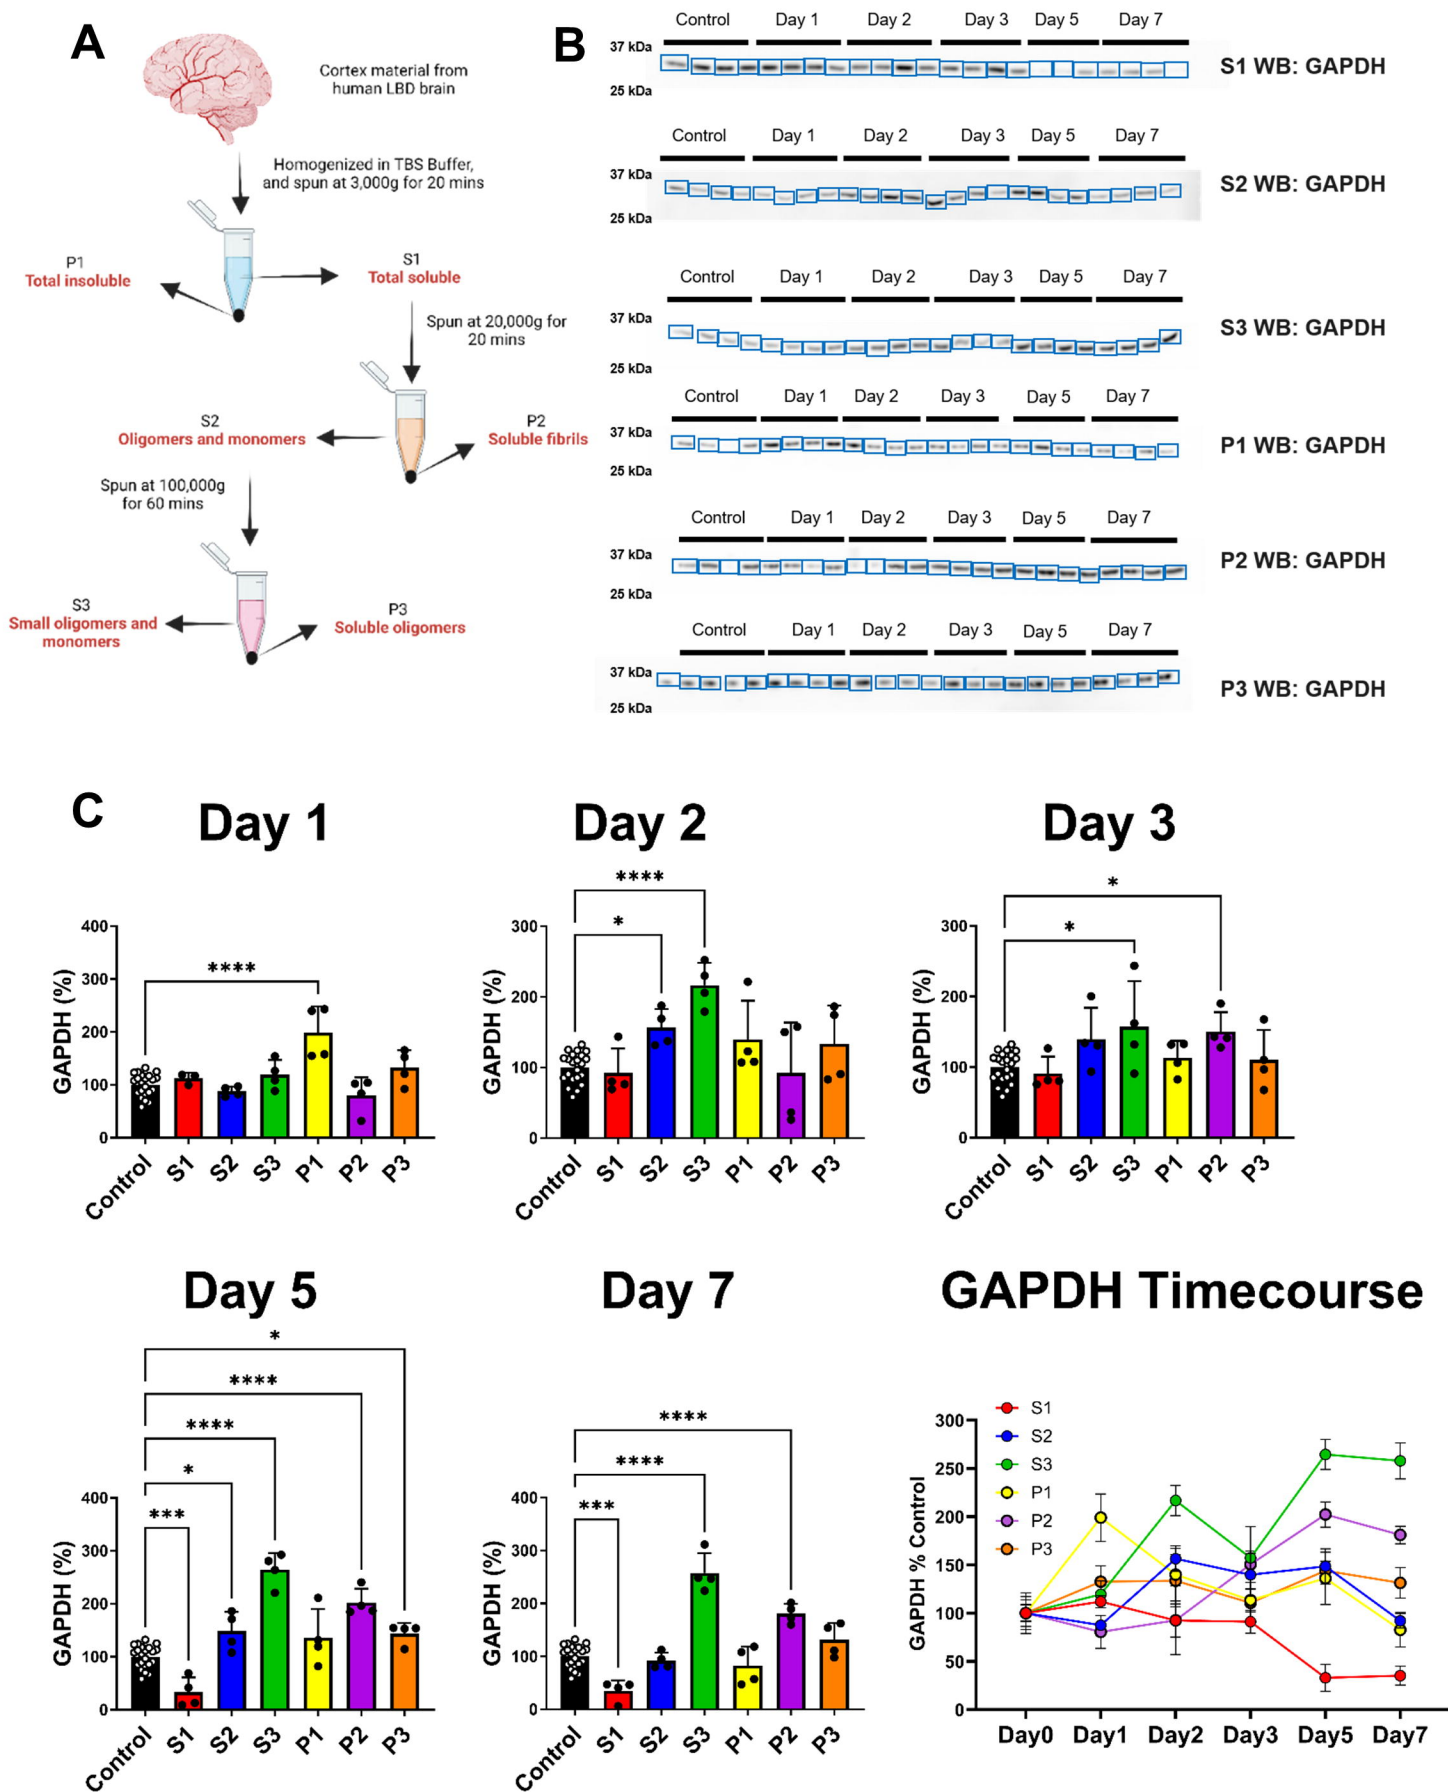

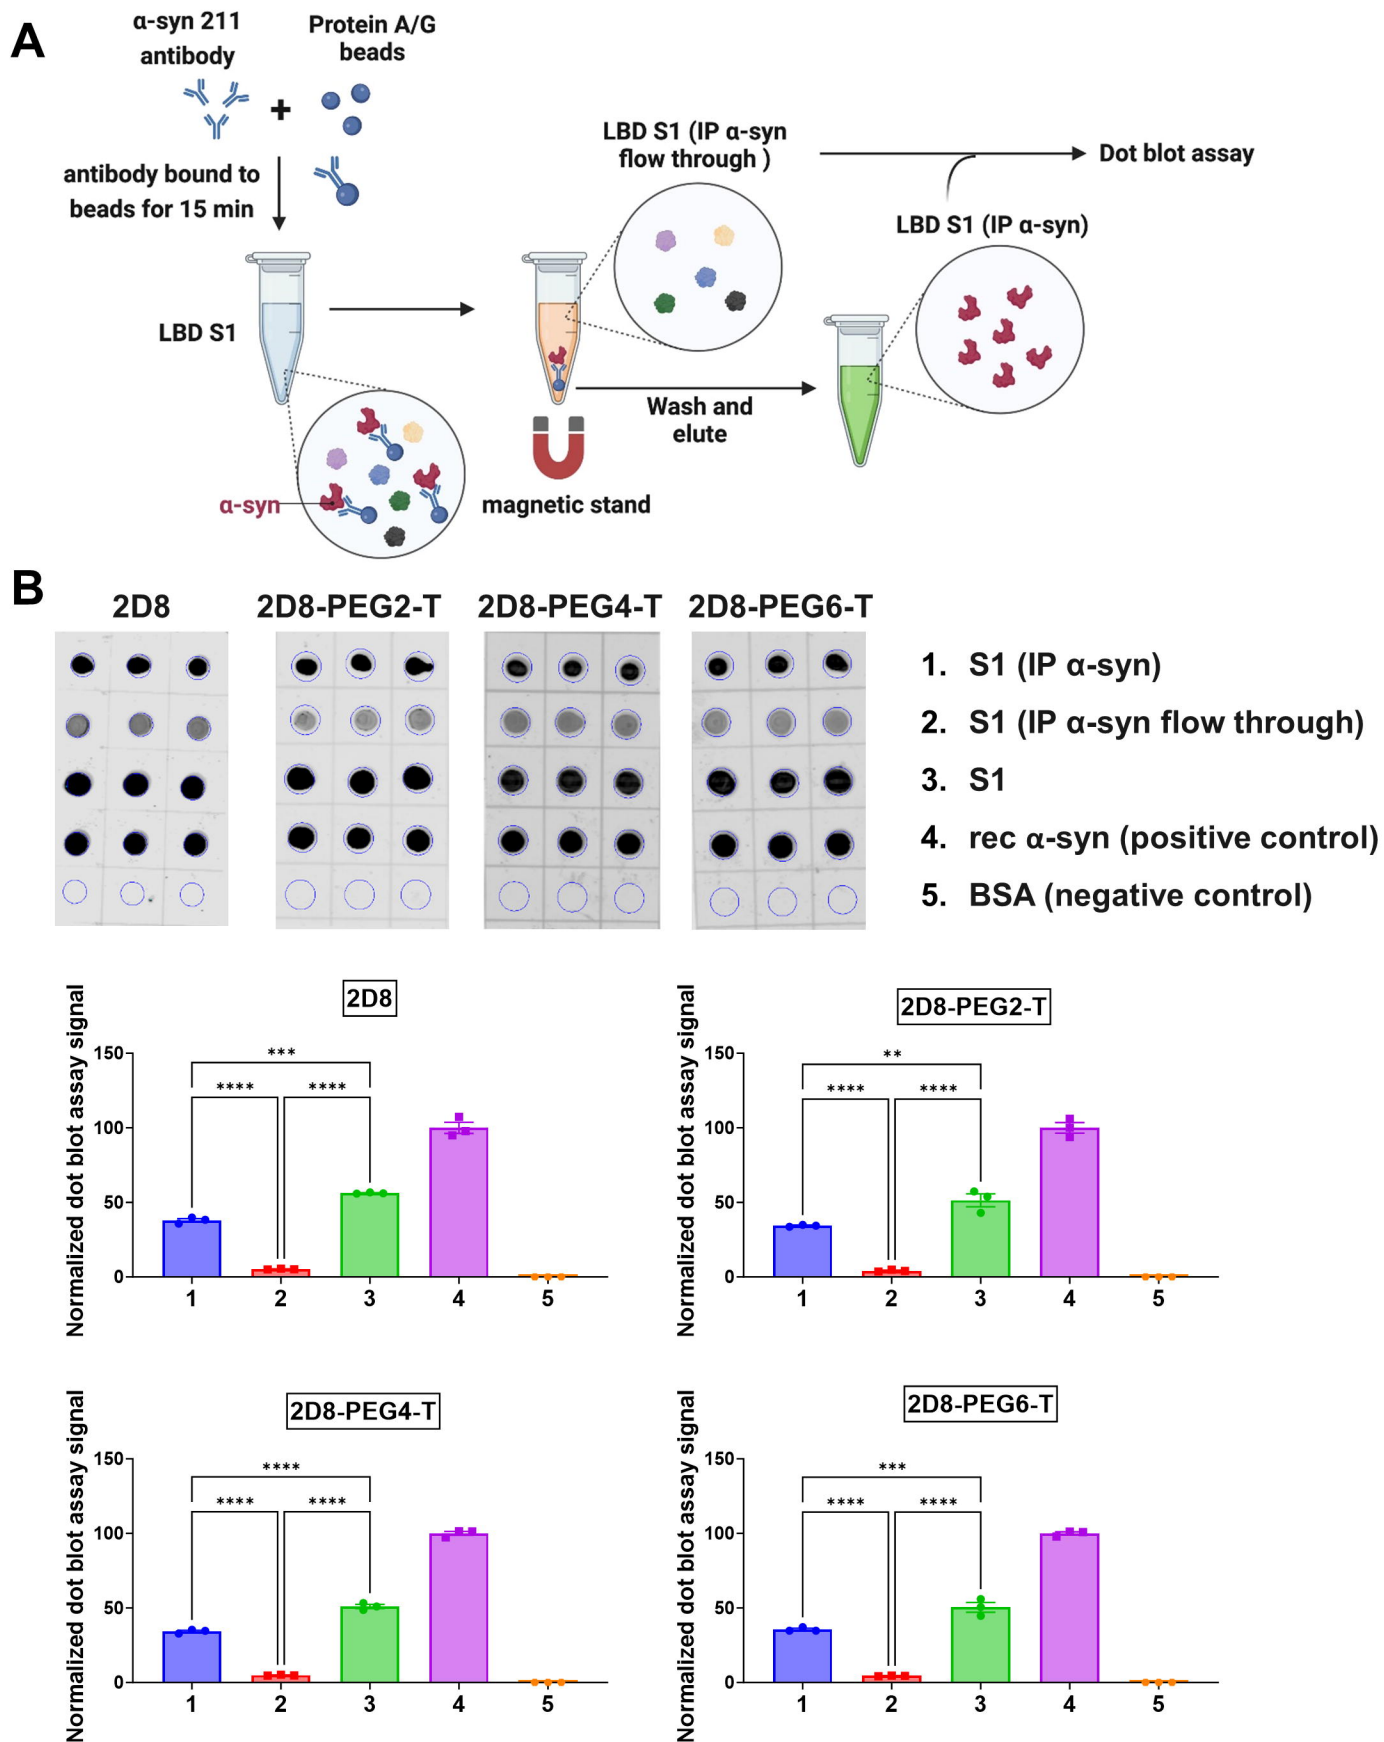

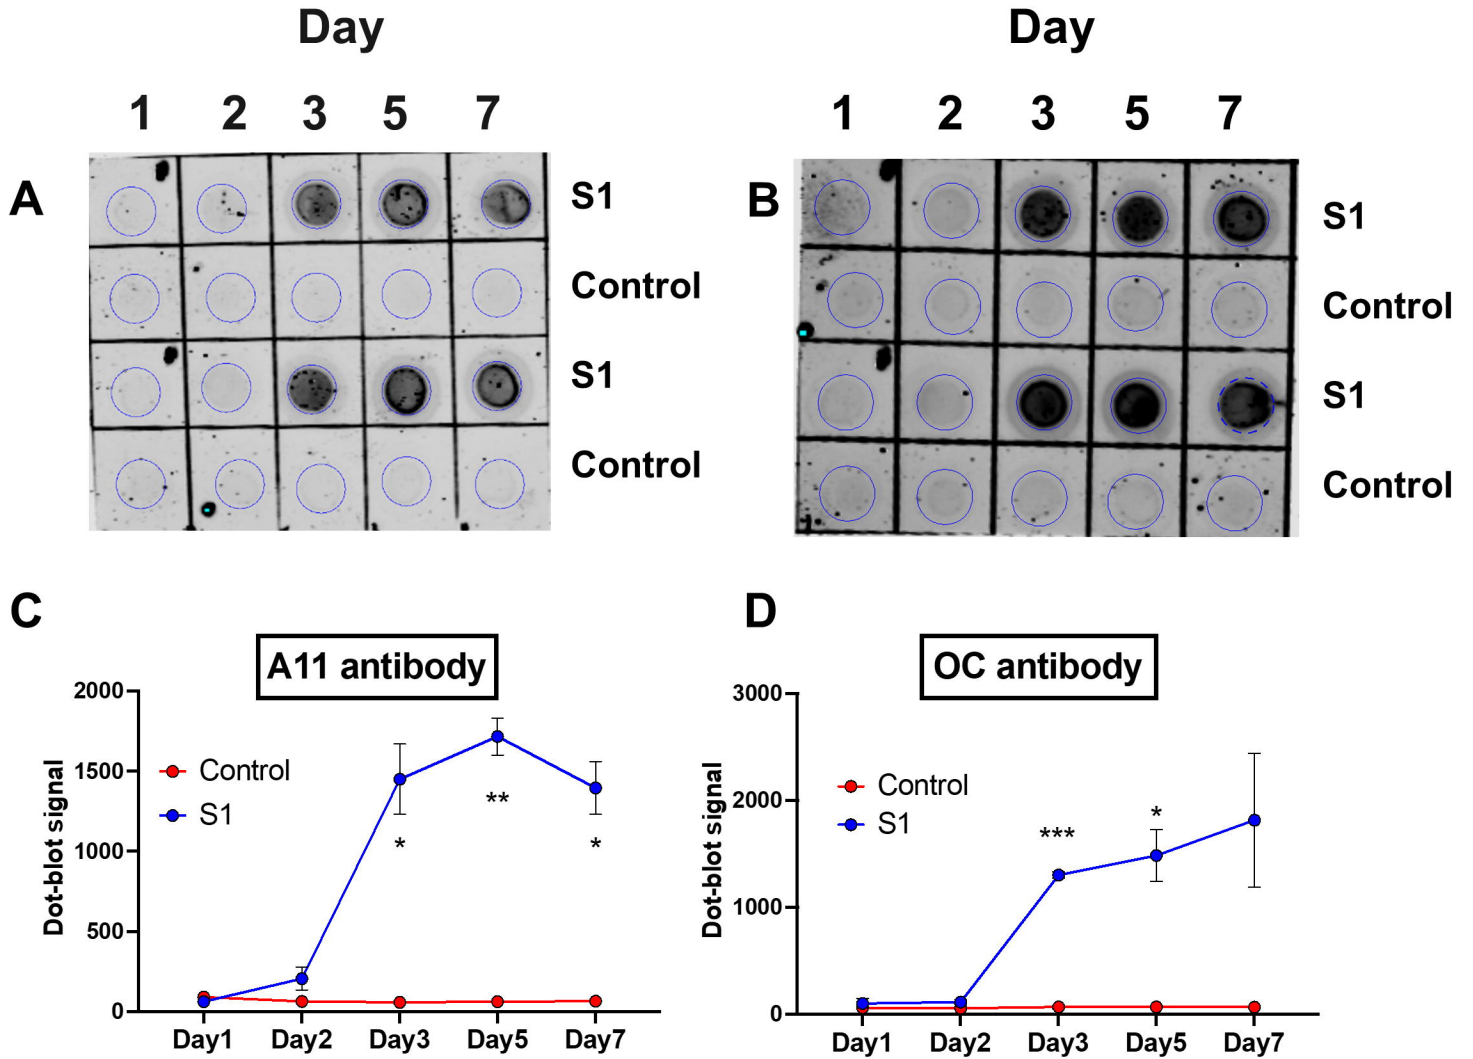



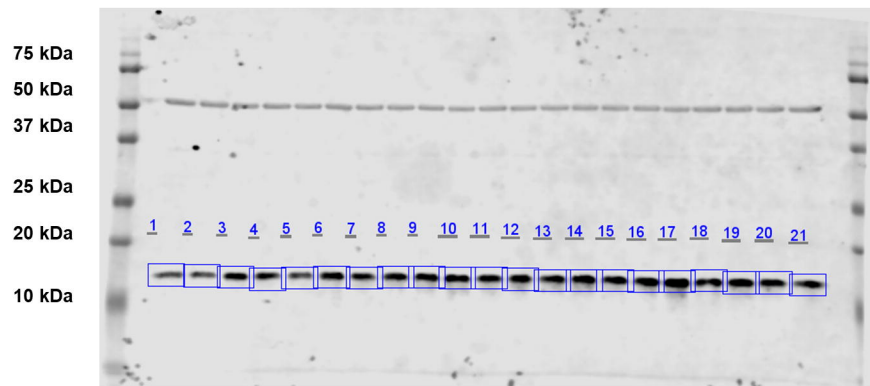

**WB:  $\alpha$ -syn 211**

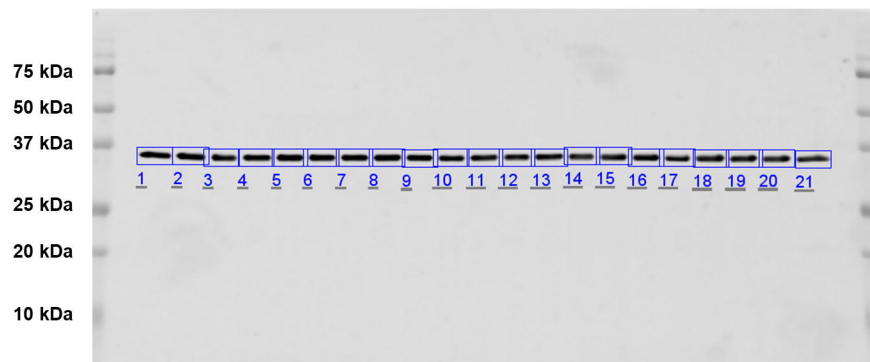

**WB: GAPDH**

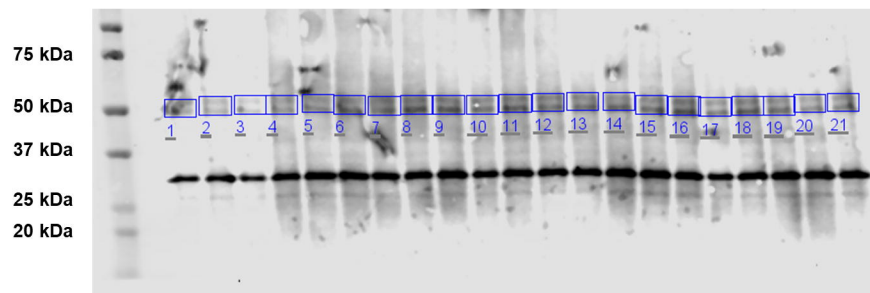

**WB: NeuN**

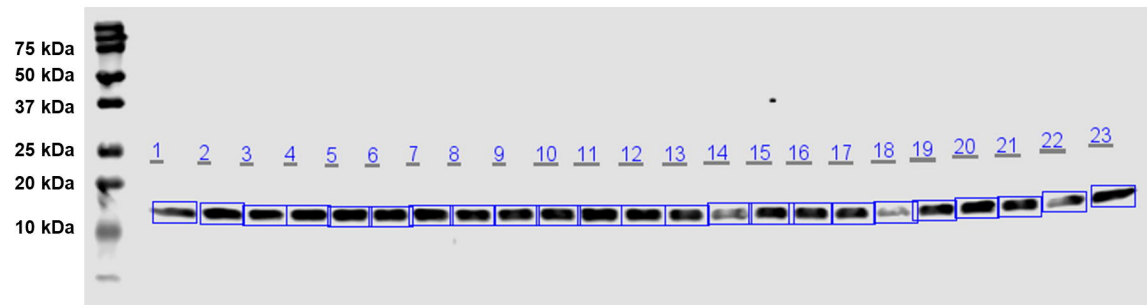

**WB:  $\alpha$ -syn 211**

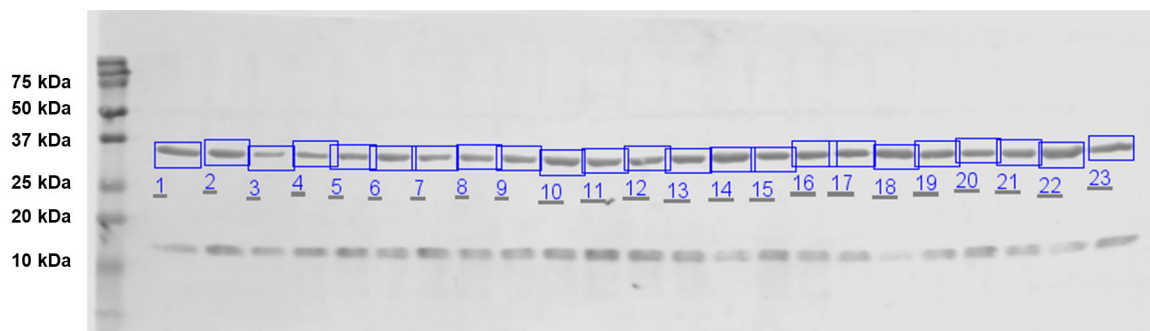

**WB: GAPDH**

## Baf. A1 treatment

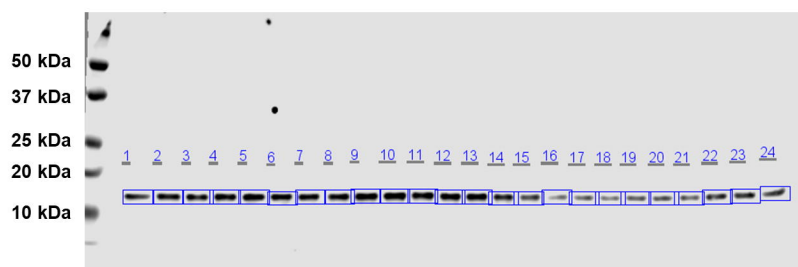

WB:  $\alpha$ -syn 211

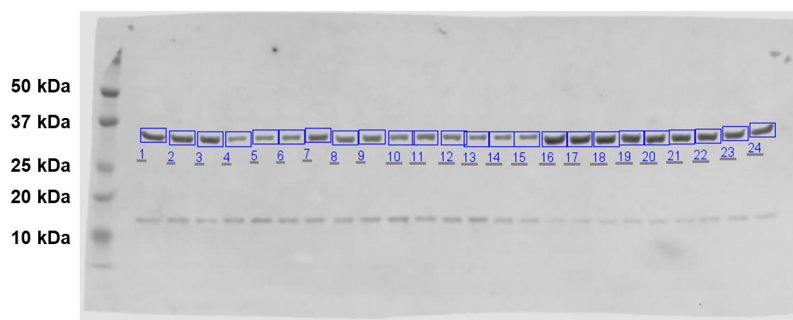

WB: GAPDH

## MG132 treatment

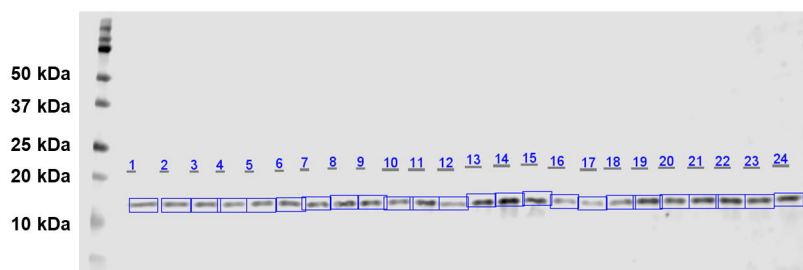

WB:  $\alpha$ -syn 211

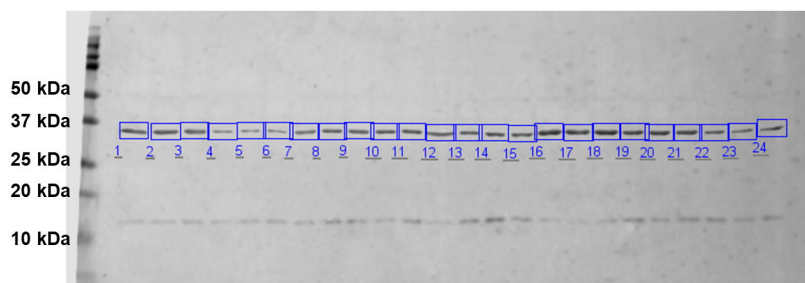

WB: GAPDH

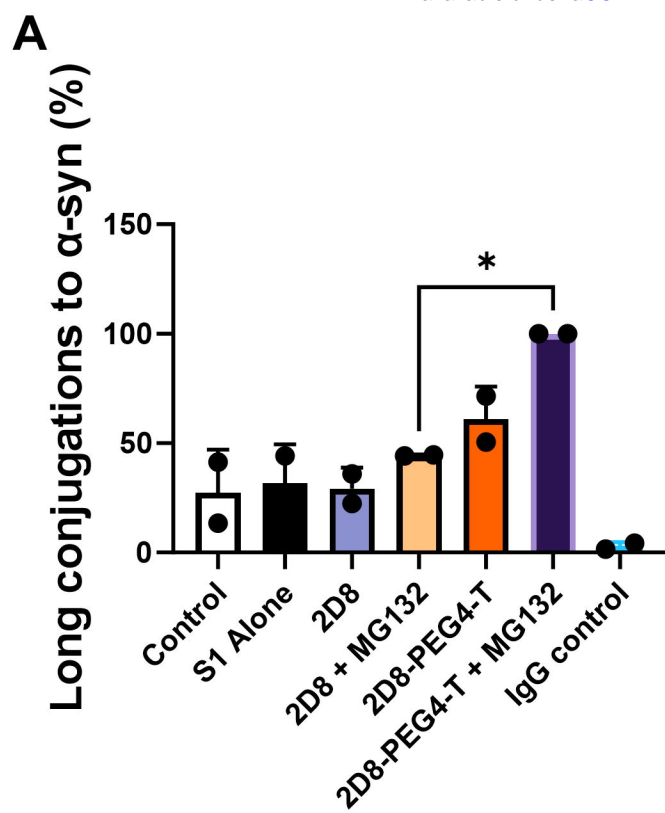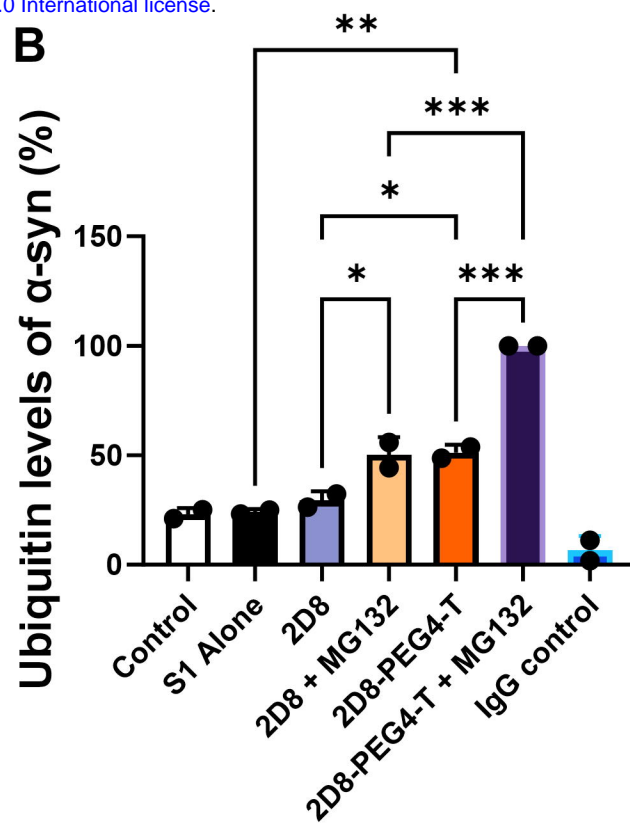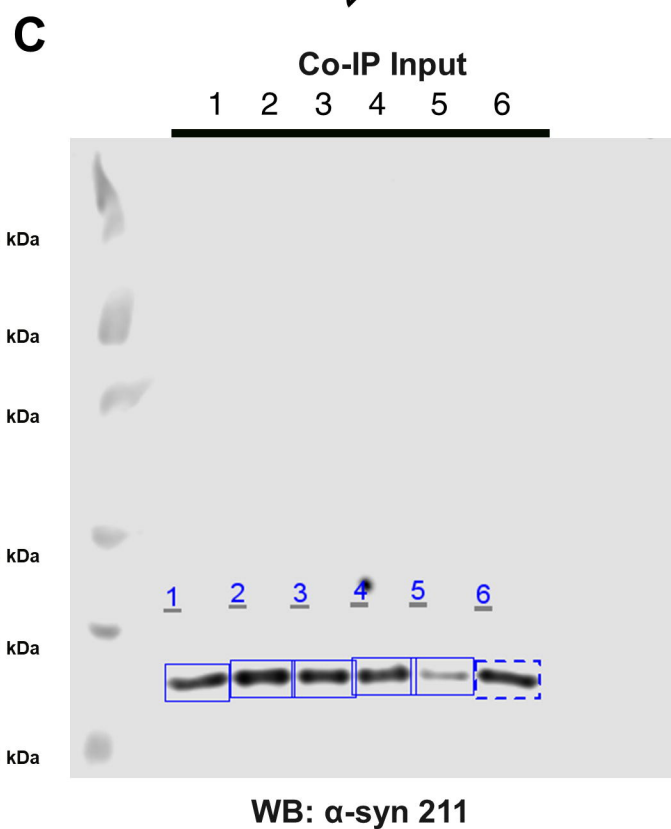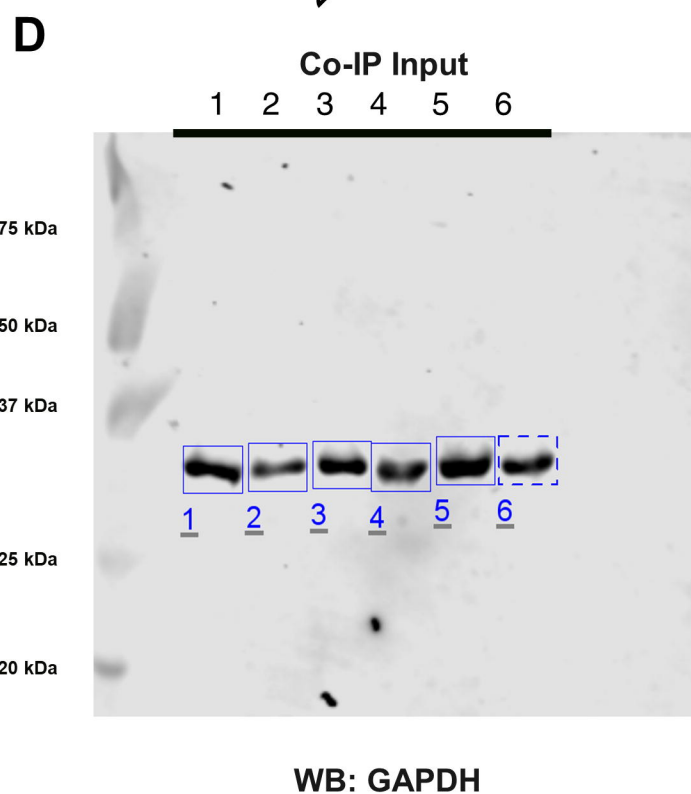

1. Control
2. S1 Alone
3. S1  $\rightarrow$  2D8
4. S1  $\rightarrow$  2D8 + 10  $\mu$ M MG132
5. S1  $\rightarrow$  2D8-PEG<sub>4</sub>-T
6. S1  $\rightarrow$  2D8-PEG<sub>4</sub>-T + 10  $\mu$ M MG132

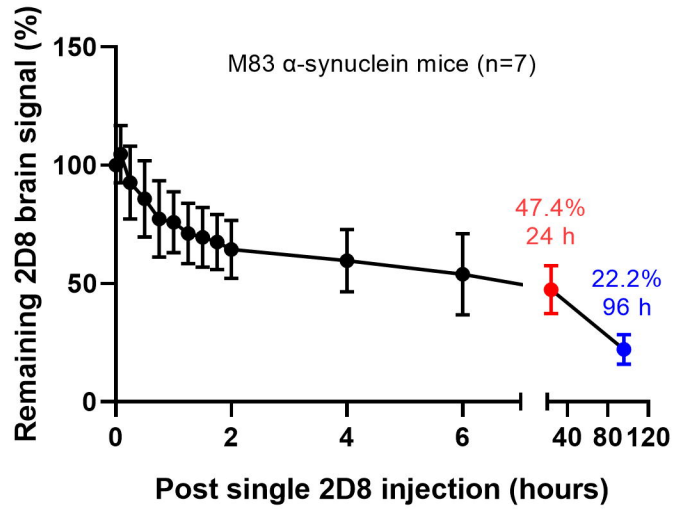

### Soluble $\alpha$ -syn levels

### Insoluble $\alpha$ -syn levels

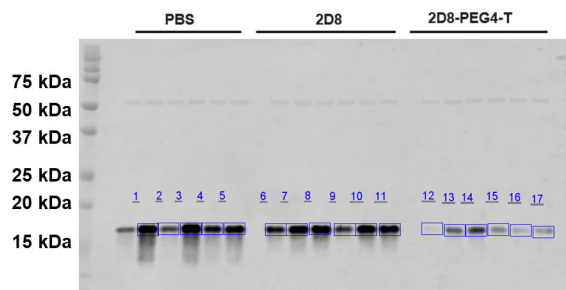

WB:  $\alpha$ -syn 211

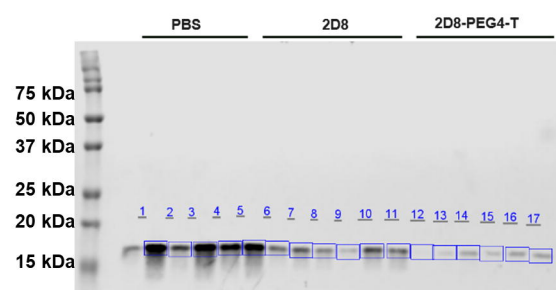

WB:  $\alpha$ -syn 211

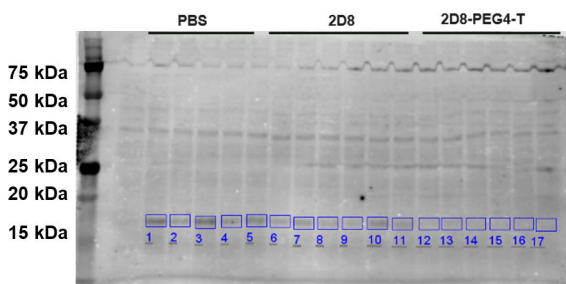

WB:  $\alpha$ -syn pS129

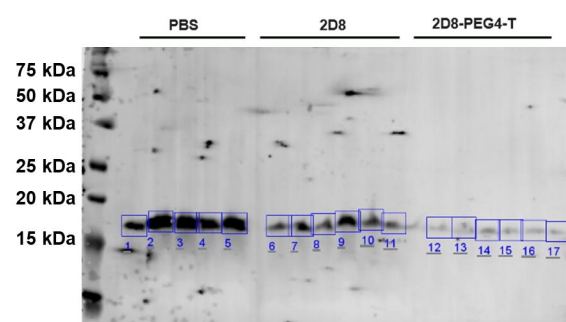

WB:  $\alpha$ -syn pS129

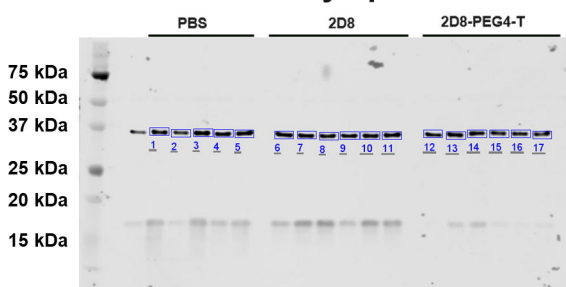

WB: GAPDH

### Glial response level

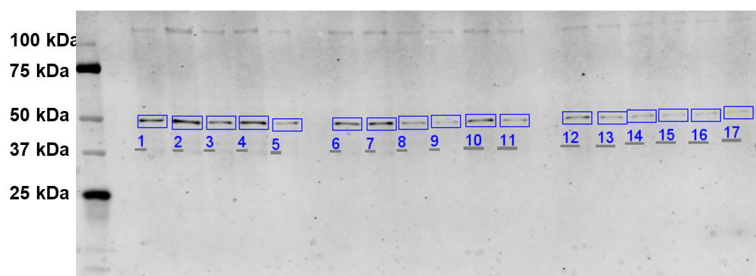

WB: GFAP

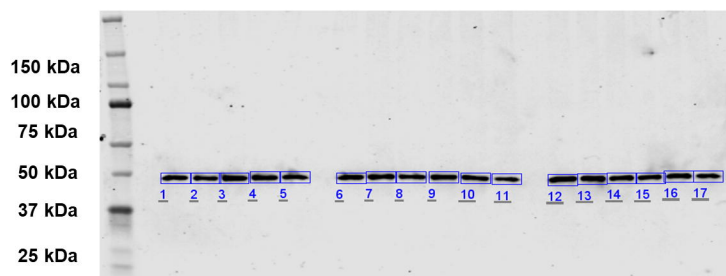

WB: GAPDH

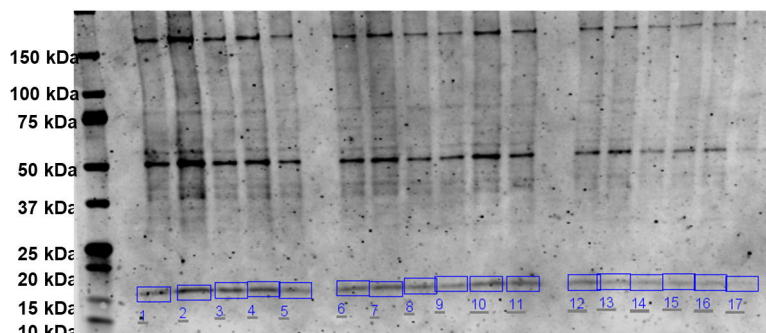

WB: Iba-1
